# Supplementary material for: Isoform-Selective NFAT Inhibitor: Potential Usefulness and Development
Source: PubMed Central journal article supplement (PMC7962815; doi:10.3390/ijms22052725), 2021-03-08
Supplement: ijms-22-02725-s001.pdf [file ijms-22-02725-s001.pdf]

*Supplementary files*

# **Isoform-Selective NFAT Inhibitor: Potential Usefulness and Development**

**Noriko Kitamura<sup>1</sup>, and Osamu Kaminuma<sup>1,2,\*</sup>**

<sup>1</sup> Laboratory of Allergy and Immunology, The Tokyo Metropolitan Institute of Medical Science, Tokyo 156-8506, Japan; kitamura-nr@igakuken.or.jp, okami@hiroshima-u.ac.jp

<sup>2</sup> Department of Disease Model, Research Institute of Radiation Biology and Medicine, Hiroshima University, Hiroshima 734-8553, Japan; okami@hiroshima-u.ac.jp

\* Correspondence: okami@hiroshima-u.ac.jp; Tel.: +81-82-257-5819

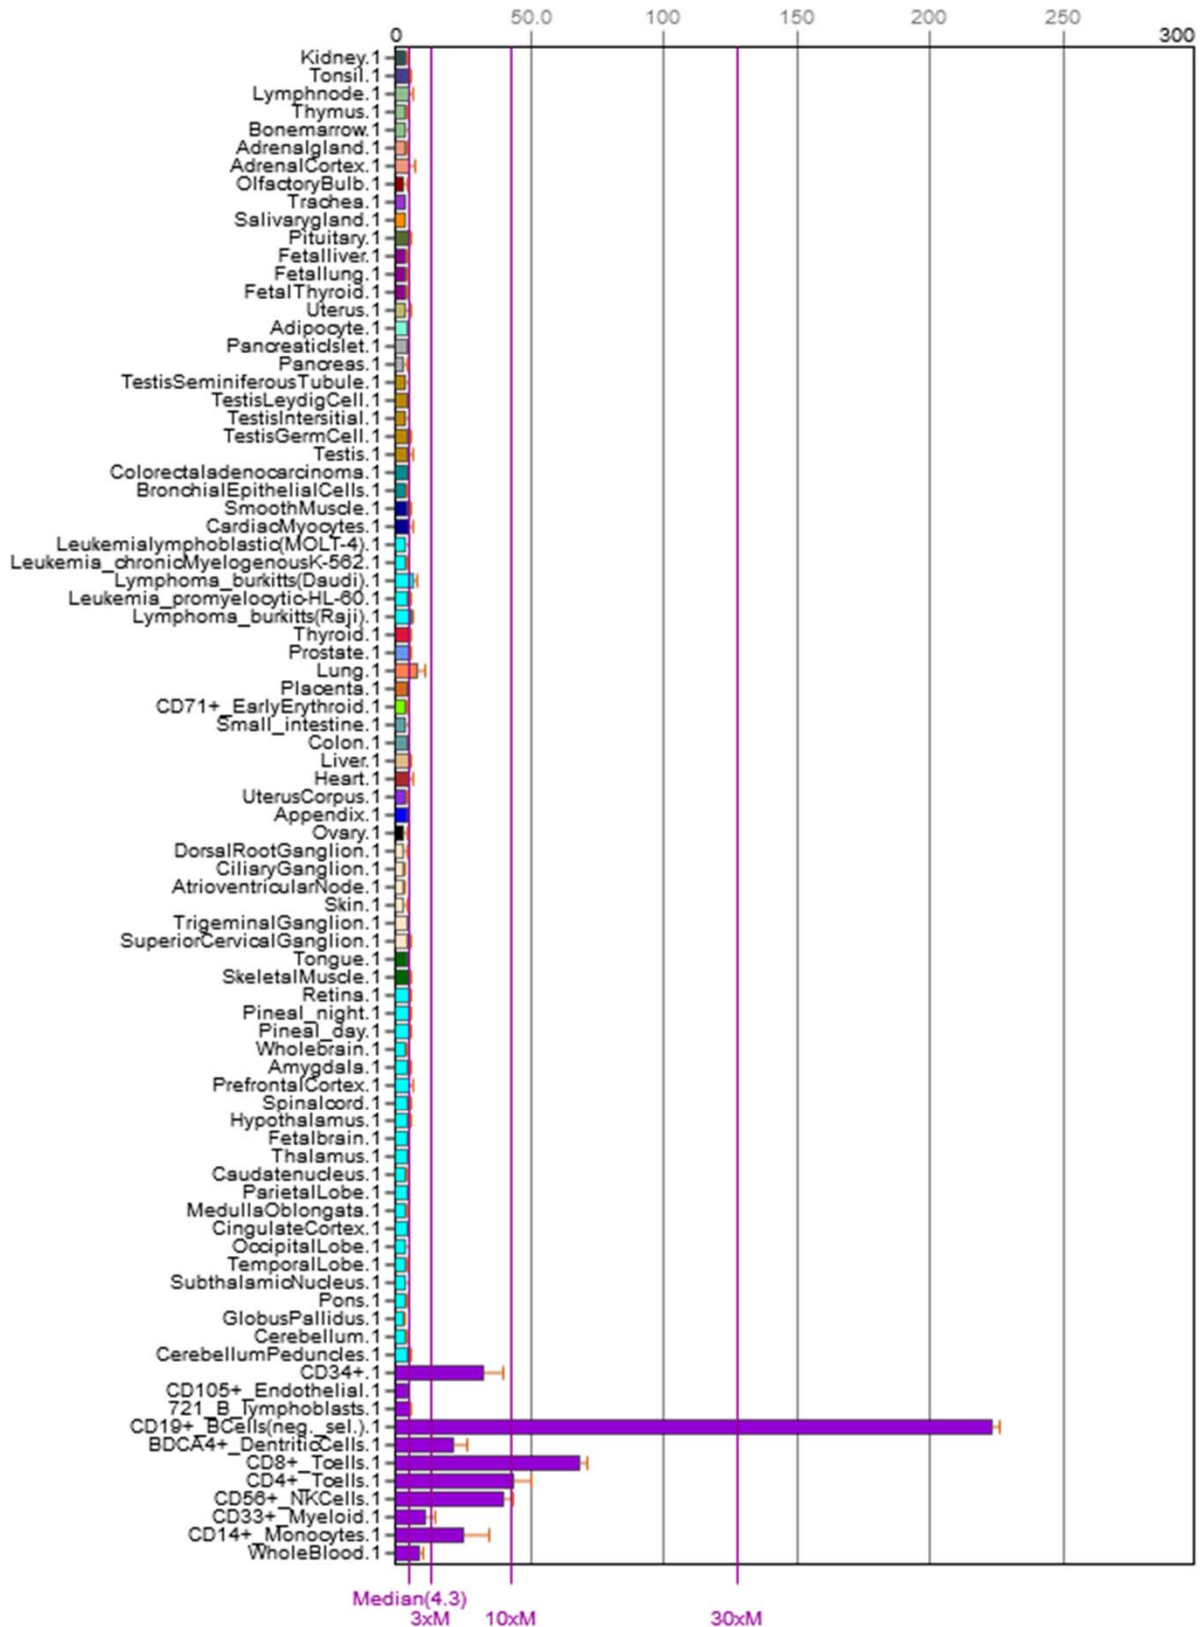

Figure S1. Expression pattern of NFATc1. The mRNA expression pattern of human NFATc1 was searched by BioGPS (<http://biogps.org/>).

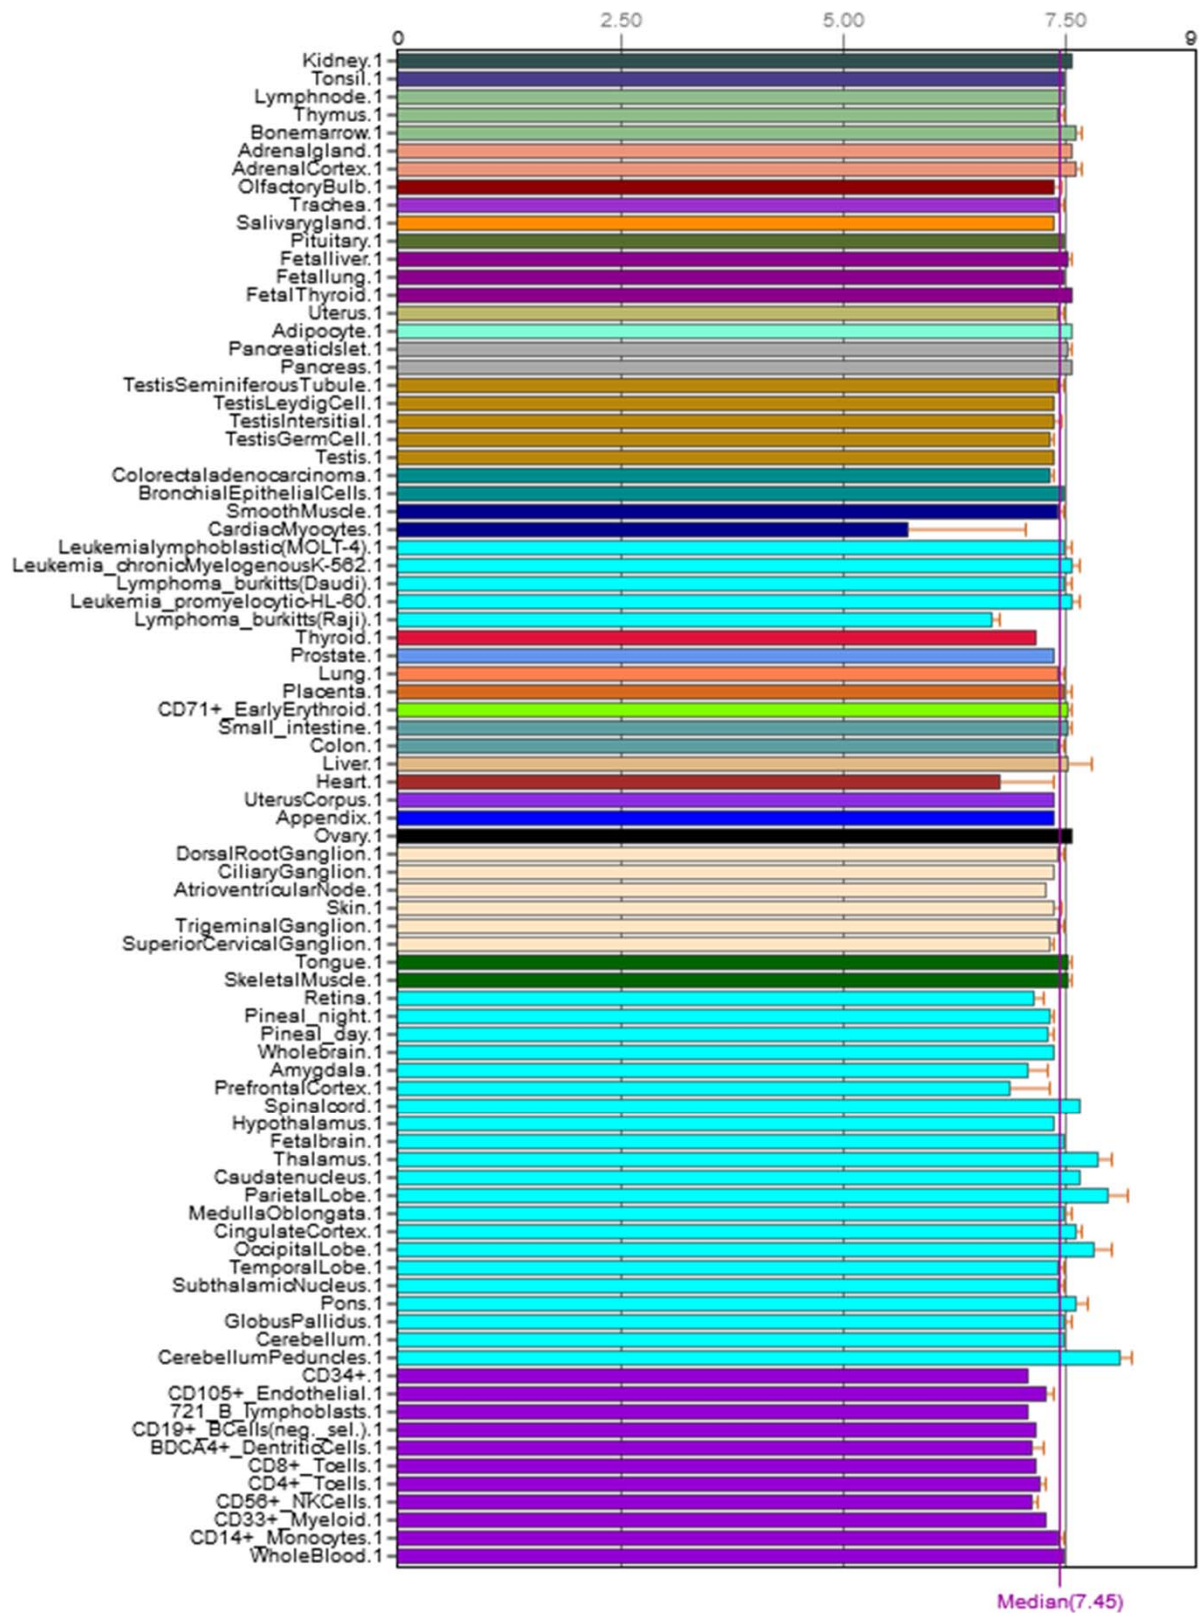

Figure S2. Expression pattern of NFATc2. The mRNA expression pattern of human NFATc2 was searched by BioGPS (<http://biogps.org/>).

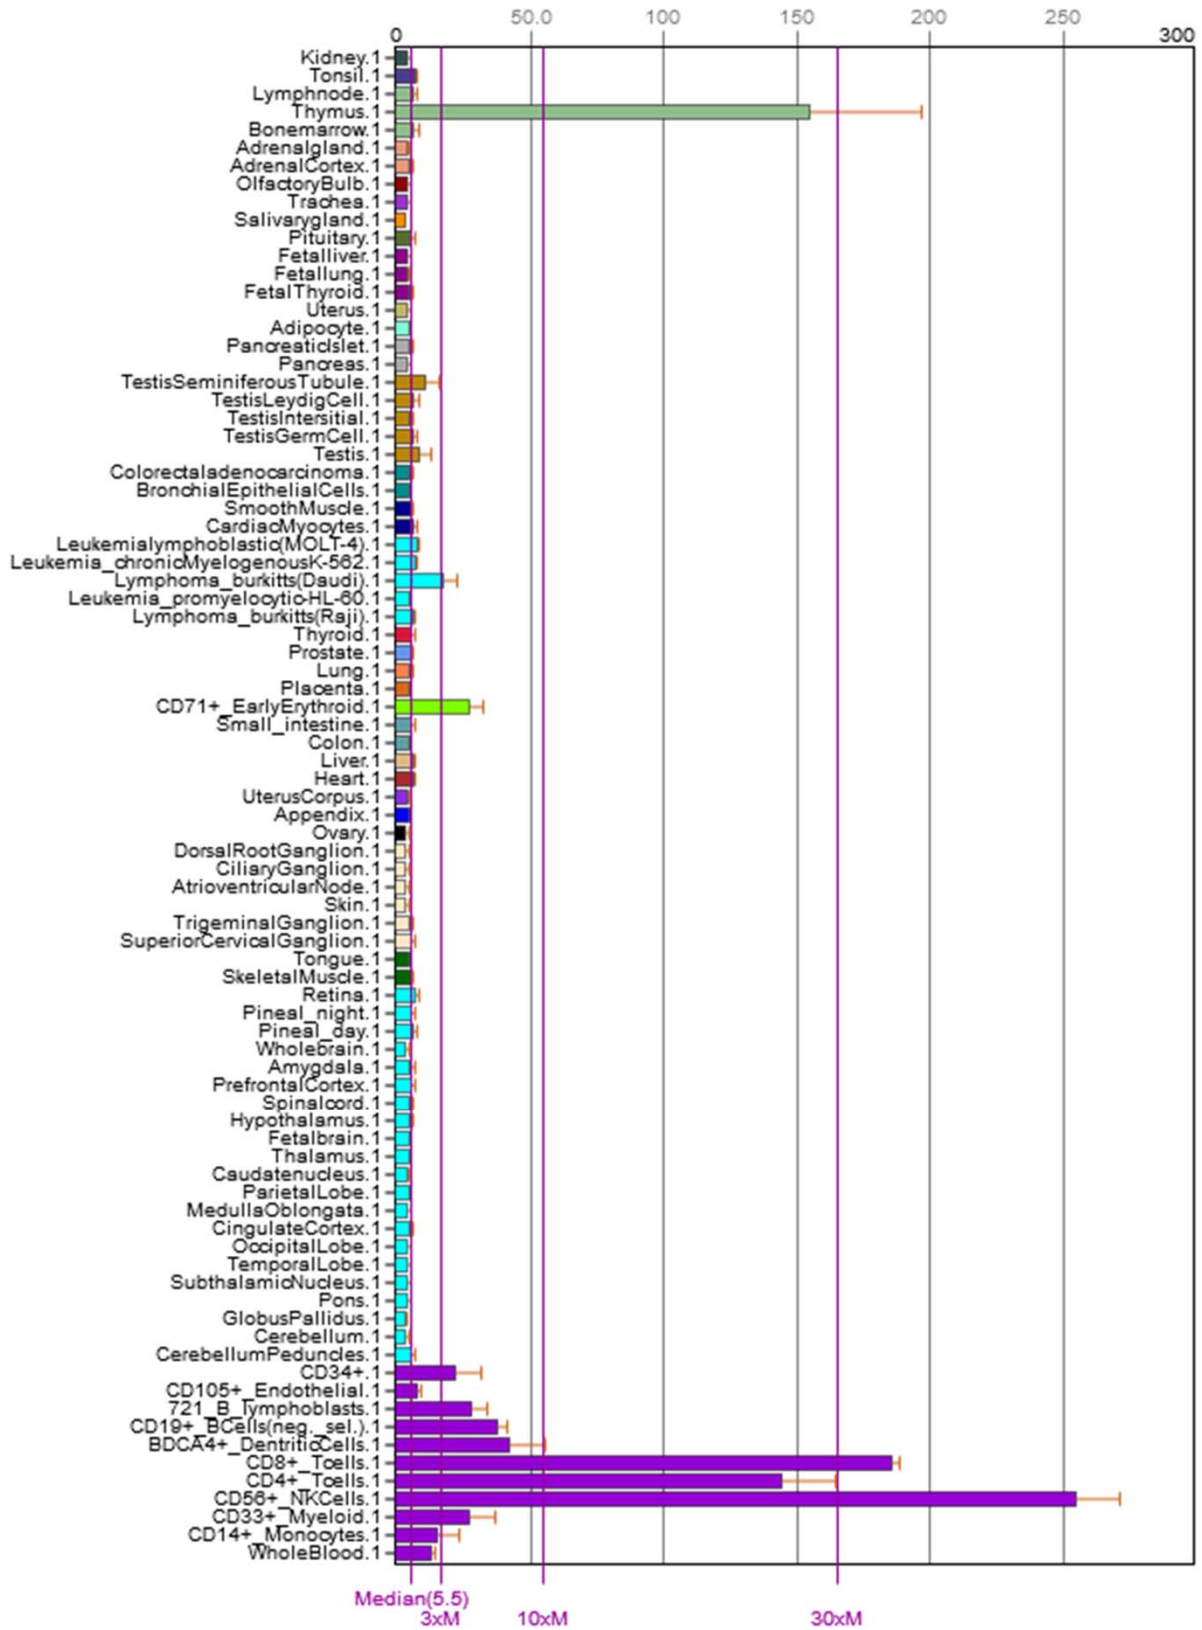

Figure S3. Expression pattern of NFATc3. The mRNA expression pattern of human NFATc3 was searched by BioGPS (<http://biogps.org/>).

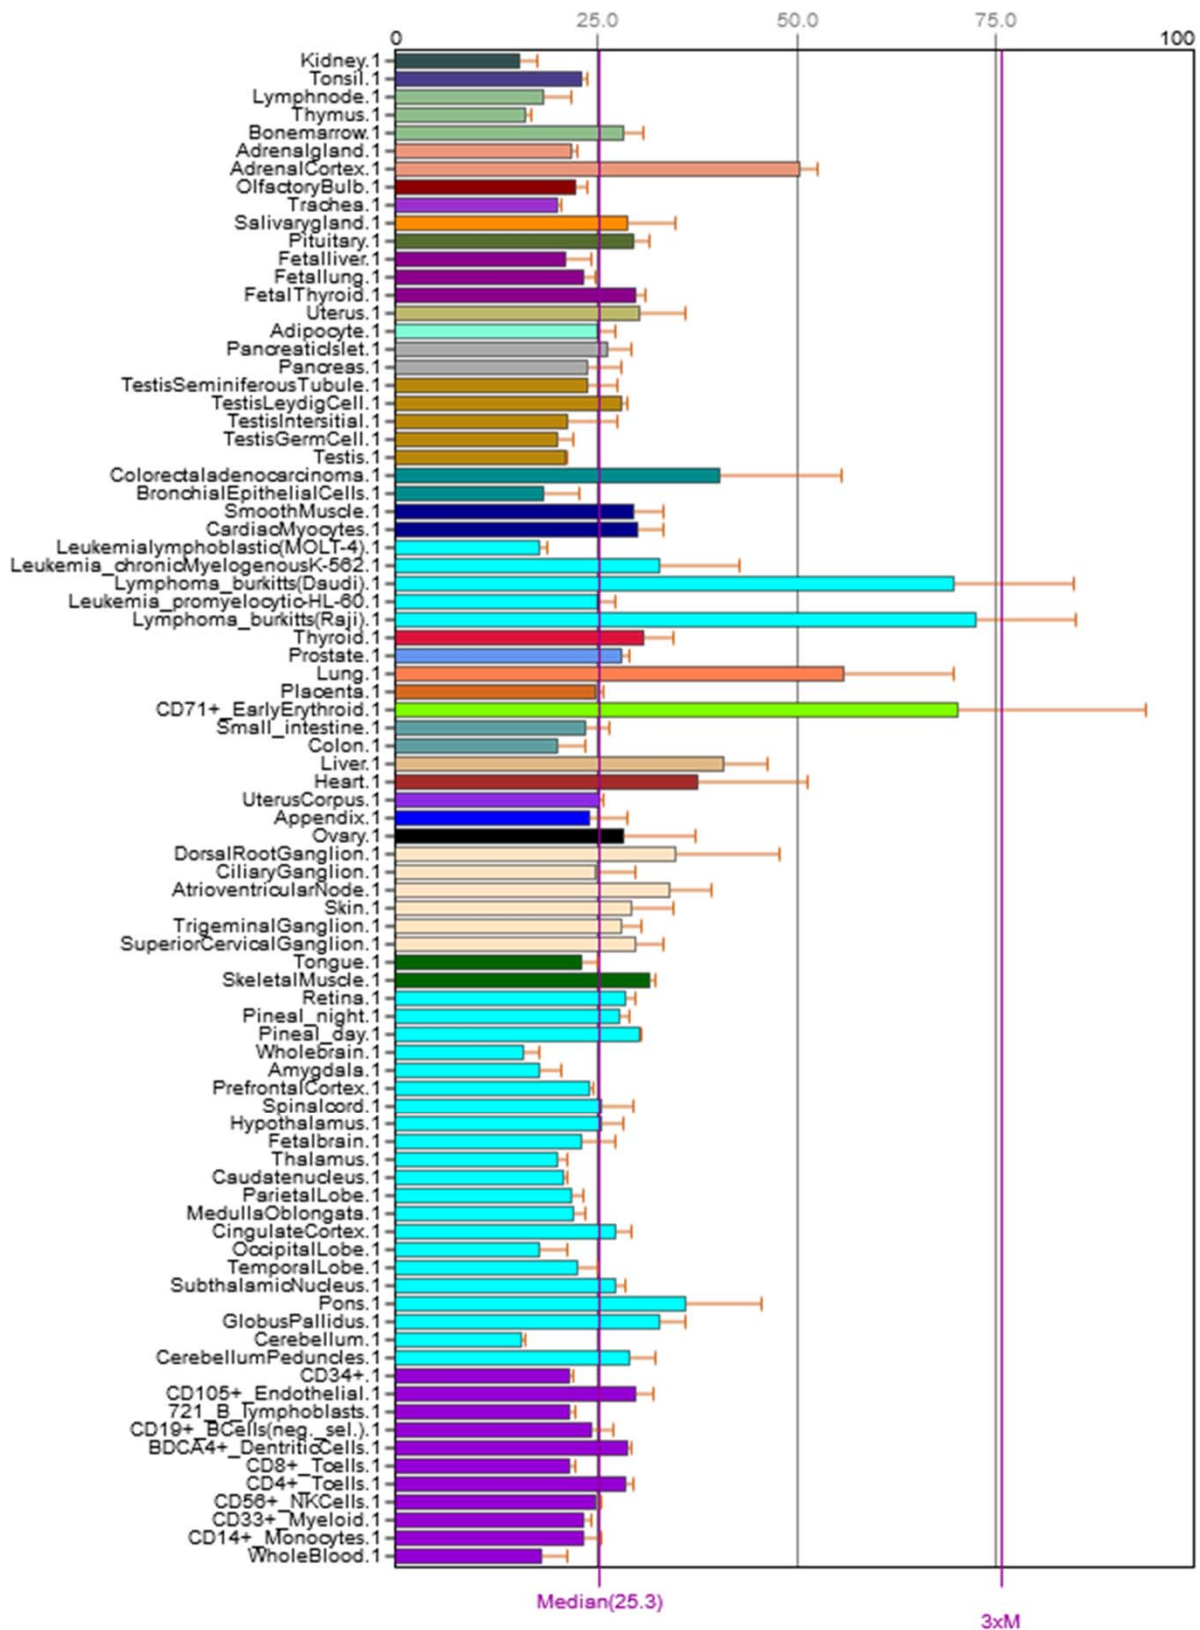

Figure S4. Expression pattern of NFATc4. The mRNA expression pattern of human NFATc4 was searched by BioGPS (<http://biogps.org/>).

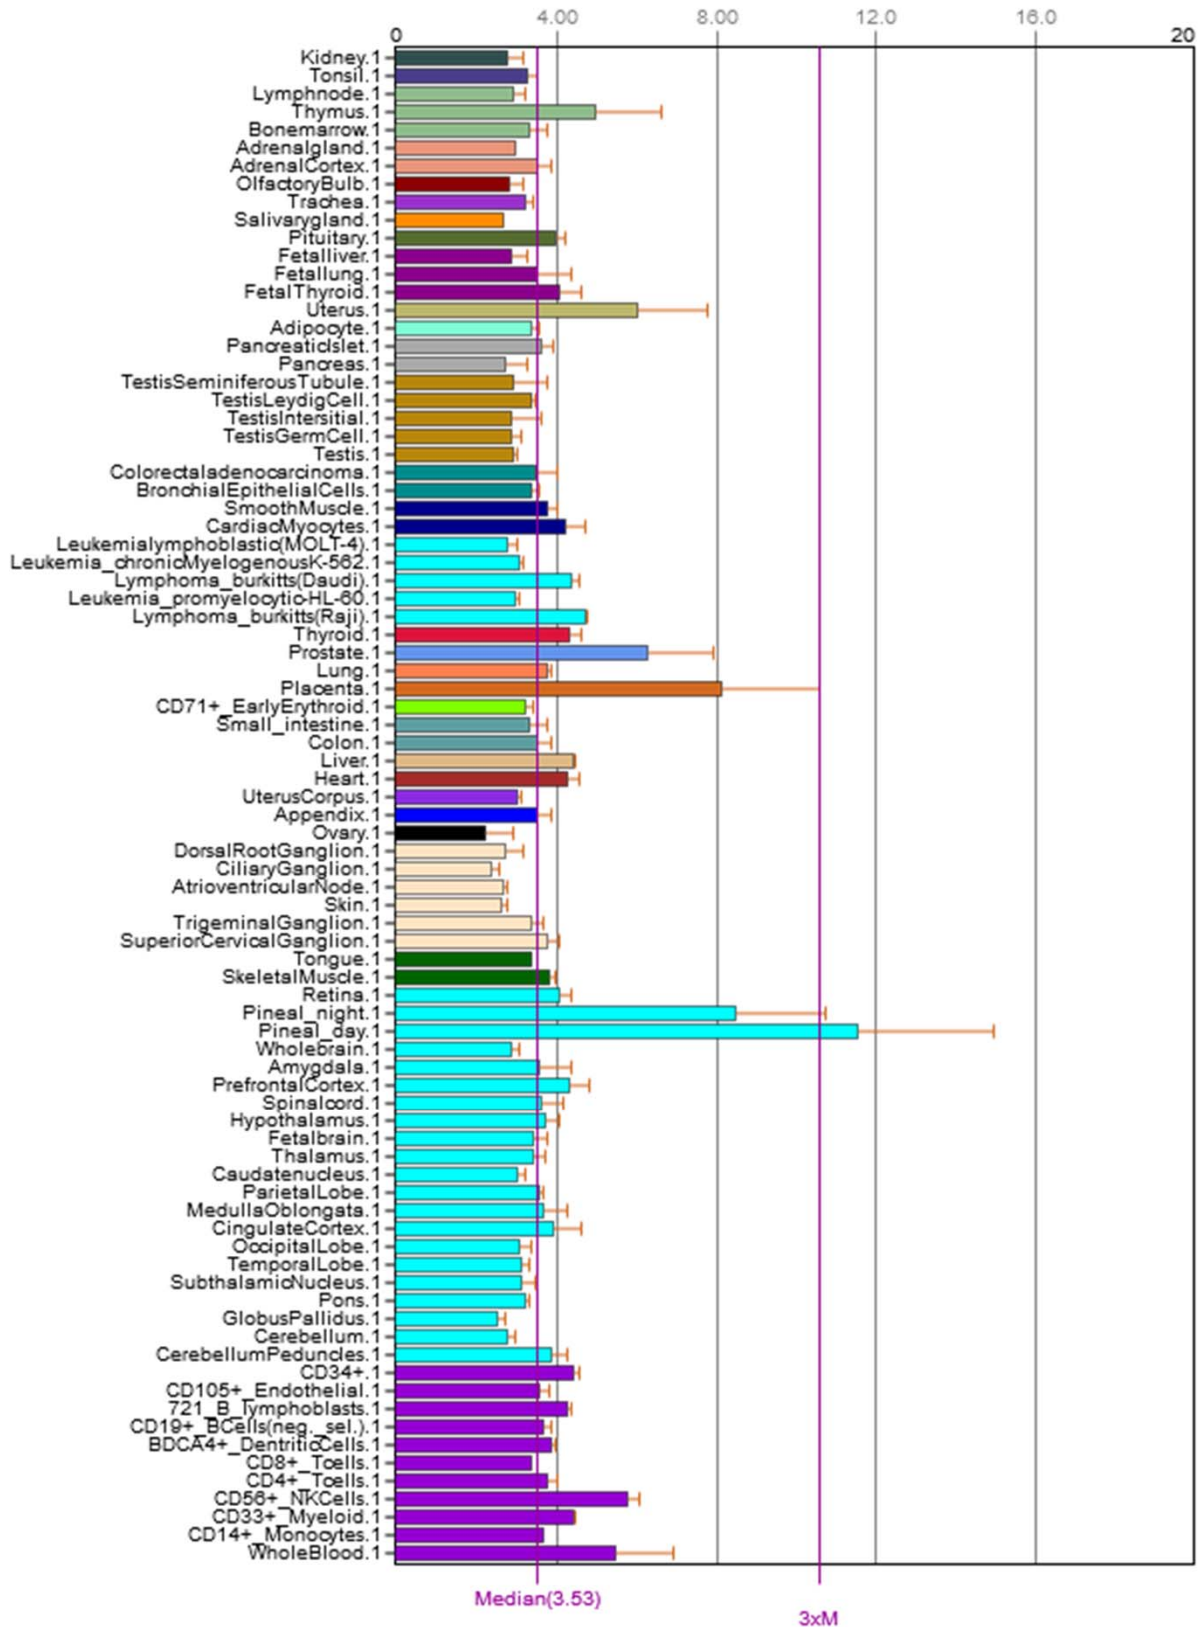

Figure S5. Expression pattern of NFAT5. The mRNA expression pattern of human NFAT5 was searched by BioGPS (<http://biogps.org/>).
